# Supplementary material
Source: PubMed Central journal article supplement (PMC2871304)
Supplement: NIHMS191223-supplement-1_si_001.pdf [file NIHMS191223-supplement-1_si_001.pdf]

# Mechanisms of Enzymatic Degradation of Amyloid Beta Microfibrils Generating Nanofilaments and Nanospheres Related to Cytotoxicity<sup>†</sup>

*Keiji Numata, David L. Kaplan\**

Department of Biomedical Engineering, Tufts University, 4 Colby Street, Medford, Massachusetts  
02155.

\*To whom correspondence should be addressed.

E-mail: david.kaplan@tufts.edu

## CORRESPONDING AUTHOR FOOTNOTE

Phone: +1-617-627-3251,

Fax : +1-617-627-3231,

E-mail: david.kaplan@tufts.edu.

**Table S1.** Percentage of the secondary structure of A $\beta$  fibrils before and after enzymatic degradation based on the CD measurements.

| Samples                     | Helix      | Strand      | Turn       | Unordered  |
|-----------------------------|------------|-------------|------------|------------|
| A $\beta$ (overall)         | 11 $\pm$ 3 | 37 $\pm$ 5  | 23 $\pm$ 1 | 30 $\pm$ 1 |
| A $\beta$ (filtered)        | 29 $\pm$ 3 | 18 $\pm$ 3  | 23 $\pm$ 1 | 30 $\pm$ 1 |
| *DP protease (overall)      | 17 $\pm$ 9 | 30 $\pm$ 8  | 22 $\pm$ 1 | 32 $\pm$ 3 |
| *DP protease (filtered)     | 30 $\pm$ 5 | 13 $\pm$ 2  | 23 $\pm$ 1 | 34 $\pm$ 2 |
| *DP chymotrypsin (overall)  | 13 $\pm$ 6 | 33 $\pm$ 9  | 22 $\pm$ 1 | 31 $\pm$ 3 |
| *DP chymotrypsin (filtered) | 31 $\pm$ 7 | 14 $\pm$ 4  | 22 $\pm$ 1 | 33 $\pm$ 3 |
| *DP NEP (overall)           | 8 $\pm$ 3  | 42 $\pm$ 9  | 21 $\pm$ 1 | 29 $\pm$ 2 |
| *DP IDE (overall)           | 3 $\pm$ 2  | 47 $\pm$ 10 | 34 $\pm$ 2 | 19 $\pm$ 2 |

\*DP: Degradation Products. Units: %. Data are represented as mean  $\pm$  standard deviation ( $n=6$ ).

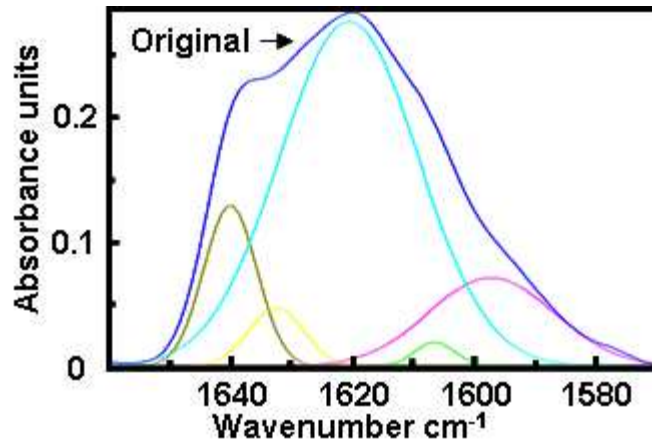

**Figure S1.** Representative MFTIR spectra (original) and deconvoluted bands of A $\beta$  fibrils before enzymatic degradation.

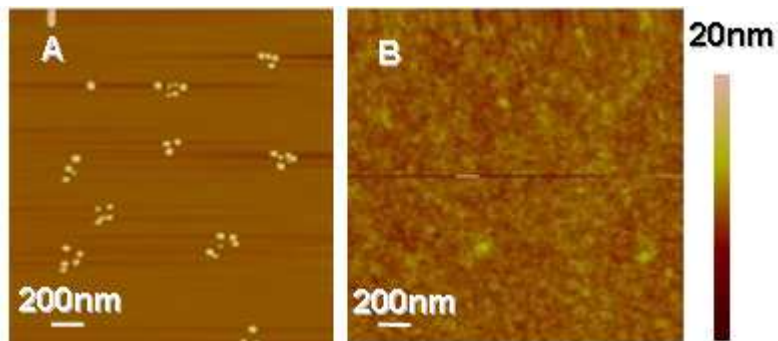

**Figure S2.** AFM height images of protease XIV (A) and by alpha-chymotrypsin (B) at a concentration of 100  $\mu\text{g/mL}$ .

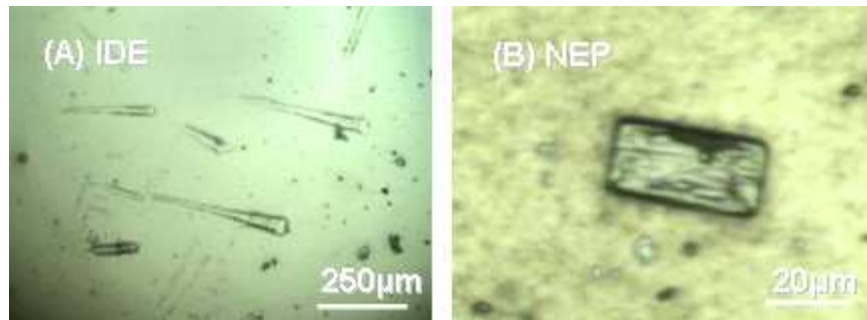

**Figure S3.** Optical microscopy images of A $\beta$  fibrils after the enzymatic degradation by IDE (A) and NEP (B).

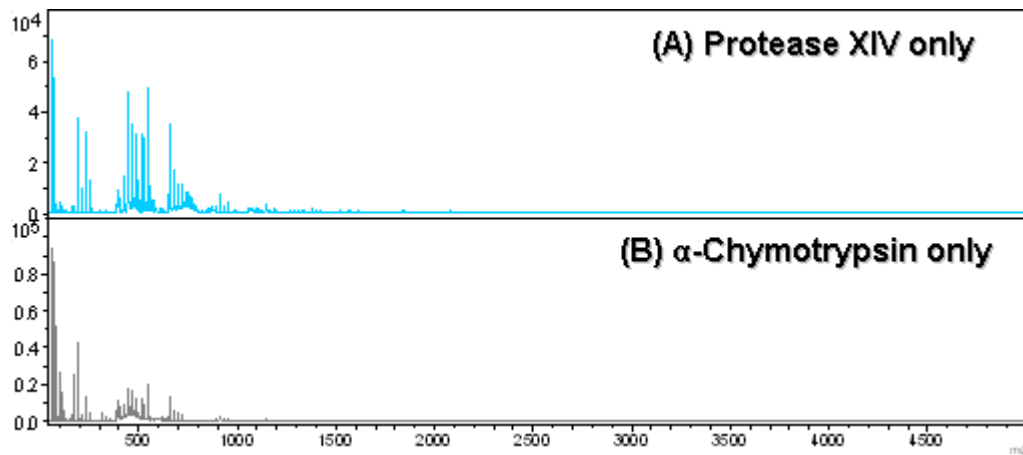

**Figure S4.** MALDI-TOF analysis of protease XIV (A) and alpha-chymotrypsin (B) at a concentration of 100  $\mu$ g/mL without A $\beta$  peptides.

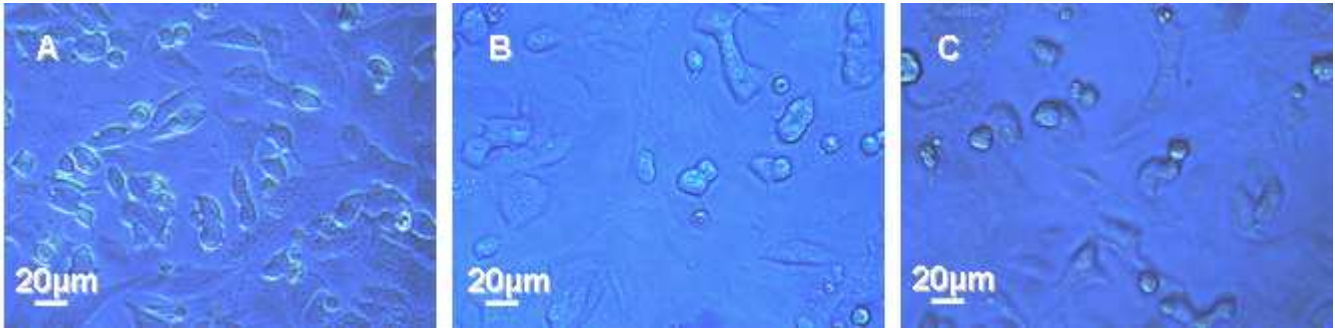

**Figure S5.** Optical microscopy images of PC 12 cells. (A) PC12 cells before differentiation. (B) PC12 cells differentiated by NGF. (C) PC12 cells after the incubation with the overall degradation products from protease XIV digestion.

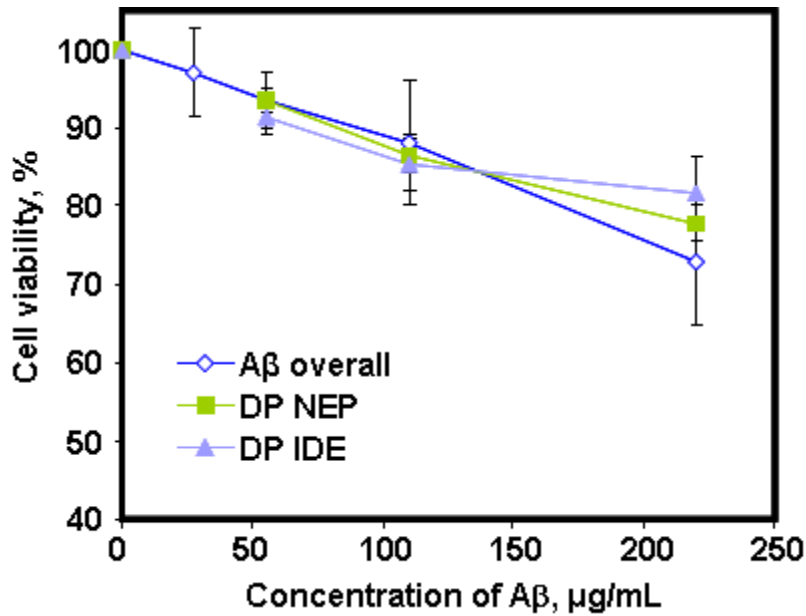

**Figure S6.** Cell viability with the A $\beta$  fibrils and their degradation fragments on differentiated PC-12 cells. Dependence of cell viability (percentage of active cells as compared to controls) on the A $\beta$  peptides measured by MTS assay. Overall A $\beta$  fibrils (blue open diamonds) show cell viability percentages of A $\beta$  fibrils before the enzymatic degradation. Overall Degradation Products (DP) by NEP (light green squares) and IDE (light blue triangles) show the percentages of each degradation products. Data are represented as mean  $\pm$  standard deviation ( $n=8$ ).
